# Supplementary material for: Which Plants for What Ailments: A Quantitative Analysis of Medicinal Ethnobotany of Ile-Ife, Osun State, Southwestern Nigeria
Source: Hindawi journal article supplement (doi:10.1155/2021/5711547), 2021-08-03
Supplement: f1 [file 5711547.f1.docx]

Supplementary File 1: Socio-cultural data of informants

| Characteristics | Frequency | Percentage (%) |
| --- | --- | --- |
| Sex  Male  Female | 39  31 | 55.7  44.3 |
| Age (years)  31-40  41-50  51-60  Greater than 60 | 14  31  19  6 | 20.0  44.3  27.1  8.6 |
| Education level  None  Adult education  Primary level  Secondary level | 24  3  37  6 | 34.3  4.3  52.9  8.6 |
| Occupation  Farmers  Herbalists  Herb-sellers  Driver  Trader  Unskilled university staff | 6  27  19  3  8  7 | 8.6  38.6  27.1  4.3  11.4  10.0 |
| Religion  Traditional worshippers  Christianity  Islam | 24  29  17 | 34.3  41.4  24.3 |
